# Supplementary material for: Rarity of monodominance in hyperdiverse Amazonian forests
Source: PubMed Central journal article supplement (PMC6761143; doi:10.1038/s41598-019-50323-9), 2019-09-25
Supplement: 41598_2019_50323_MOESM1_ESM.pdf [file 41598_2019_50323_MOESM1_ESM.pdf]

## Supplementary information to

### Rarity of monodominance in hyperdiverse Amazonian forests

Hans ter Steege,1,2 Terry W. Henkel,3 Nora Helal,1 Beatriz S. Marimon,4 Ben Hur Marimon-Junior,4 Andreas Huth,5 Jürgen Groeneveld,5,6 Daniel Sabatier,7 Luiz de Souza Coelho,8 Diogenes de Andrade Lima Filho,8 Rafael P. Salomão,9,10 Iêda Leão Amaral,8 Francisca Dionízia de Almeida Matos,8 Carolina V. Castilho,11 Oliver L. Phillips,12 Juan Ernesto Guevara,13,14 Marcelo de Jesus Veiga Carim,15 Dairon Cárdenas López,16 William E. Magnusson,17 Florian Wittmann,18,19 Mariana Victória Irumé,8 Maria Pires Martins,8 José Renan da Silva Guimarães,15 Jean-François Molino,7 Olaf S. Bánki,20 Maria Teresa Fernandez Piedade,21 Nigel C.A. Pitman,22 Abel Monteagudo Mendoza,23 José Ferreira Ramos,8 Bruno Garcia Luize,24 Evelyn Márcia Moraes de Leão Novo,25 Percy Núñez Vargas,26 Thiago Sanna Freire Silva,27 Eduardo Martins Venticinque,28 Angelo Gilberto Manzatto,29 Neidiane Farias Costa Reis,30 John Terborgh,31,32 Katia Regina Casula,30 Euridice N. Honorio Coronado,33,12 Juan Carlos Montero,34,8 Ted R. Feldpausch,35,12 Alvaro Duque,36 Flávia R.C. Costa,8 Nicolás Castaño Arboleda,16 Jochen Schöngart,21 Timothy J. Killeen,37 Rodolfo Vasquez,23 Bonifacio Mostacedo,38 Layon O. Demarchi,21 Rafael L. Assis,39 Chris Baraloto,40 Julien Engel,7,40 Pascal Petronelli,41 Hernán Castellanos,42 Marcelo Brilhante de Medeiros,43 Adriano Quaresma,21 Marcelo Fragomeni Simon,43 Ana Andrade,44 José Luís Camargo,44 Susan G.W. Laurance,32 William F. Laurance,32 Lorena M. Rincón,8 Juliana Schiatti,8 Thaiané R. Sousa,8 Emanuelle de Sousa Farias,45,46 Maria Aparecida Lopes,47 José Leonardo Lima Magalhães,48,49 Henrique Eduardo Mendonça Nascimento,8 Helder Lima de Queiroz,50 Gerardo A. Aymard C.,51 Roel Brienen,12 Juan David Cardenas Revilla,8 Ima Célia Guimarães Vieira,10 Bruno Barçante Ladvocat Cintra,21,12 Pablo R. Stevenson,52 Yuri Oliveira Feitosa,53 Joost F. Duivenvoorden,54 Hugo F. Mogollón,55 Alejandro Araujo-Murakami,56 Leandro Valle Ferreira,10 José Rafael Lozada,57 James A. Comiskey,58,59 José Julio de Toledo,60 Gabriel Damasco,61 Nállarett Dávila,62 Freddie Draper,63,40 Roosevelt García-Villacorta,64,65 Aline Lopes,21,66 Alberto Vicentini,17 Alfonso Alonso,59 Francisco Dallmeier,59 Vitor H.F. Gomes,10,67 Jon Lloyd,68 David Neill,69 Daniel Praia Portela de Aguiar,21 Luzmila Arroyo,56 Fernanda Antunes Carvalho,17,70 Fernanda Coelho de Souza,17,12 Dário Dantas do Amaral,10 Kenneth J. Feeley,71,72 Rogerio Gribel,73 Marcelo Petratti Pansonato,8,74 Jos Barlow,75 Erika Berenguer,76 Joice Ferreira,49 Paul V.A. Fine,61 Marcelino Carneiro Guedes,77 Eliana M. Jimenez,78 Juan Carlos Licona,34 Maria Cristina Peñuela Mora,79 Boris Villa,21 Carlos Cerón,80 Paul Maas,81 Marcos Silveira,82 Juliana Stropp,83 Raquel Thomas,84 Tim R. Baker,12 Doug Daly,85 Kyle G. Dexter,86,65 Isau Huamantupa-Chuquimaco,26 William Milliken,87 Toby Pennington,35,65 Marcos Ríos Paredes,88 Alfredo Fuentes,89,90 Bente Klitgaard,91 José Luís Marcelo Pena,92 Carlos A. Peres,93 Miles R. Silman,94 J. Sebastián Tello,90 Jerome Chave,95 Fernando Cornejo Valverde,96 Anthony Di Fiore,97 Renato Richard Hilário,60 Juan Fernando Phillips,98 Gonzalo Rivas-Torres,99,100 Tinde R. van Andel,1 Patricio von Hildebrand,101 Janaína Costa Noronha,102 Edelcilio Marques Barbosa,8 Flávia Rodrigues Barbosa,102 Luiz Carlos de Matos Bonates,8 Rainiellen de Sá Carpanedo,102 Hilda Paulette Dávila Doza,88 Émile Fonty,103,7 Ricardo Zárate Gómez,104 Therany Gonzales,105 George Pepe Gallardo Gonzales,88 Bruce Hoffman,106 André Braga Junqueira,107 Yadvinder Malhi,108 Ires Paula de Andrade Miranda,8 Linder Felipe Mozombite Pinto,88 Adriana Prieto,109 Domingos de Jesus Rodrigues,102 Agustín Rudas,109 Ademir R. Ruschel,49 Natalino Silva,110 César I.A. Vela,111 Vincent Antoine Vos,112 Egleé L. Zent,113 Stanford Zent,113 Bianca Weiss Albuquerque,21 Angela Cano,52,114 Yrma Andreina Carrero Márquez,57 Diego F. Correa,52,115 Janaina Barbosa Pedrosa Costa,77 Bernardo Monteiro Flores,116 David Galbraith,12 Milena Holmgren,117 Michelle Kalamandeen,12 Marcelo Trindade Nascimento,118 Alexandre A. Oliveira,74 Hirma Ramirez-Angulo,119 Maira Rocha,21 Veridiana Vizoni Scudeller,120 Rodrigo Sierra,121 Milton Tirado,121 Maria Natalia Umaña Medina,52,122 Geertje van der Heijden,123 Emilio Vilanova Torre,119,124 Corine Vriesendorp,22 Ophelia Wang,125 Kenneth R. Young,126 Manuel Augusto Ahuite Reategui,127 Cláudia Baidier,128,74 Henrik Balslev,129 Sasha Cárdenas,52 Luisa Fernanda Casas,52 William Farfan-Rios,94 Cid Ferreira,8 Reynaldo Linares-Palomino,59 Casimiro Mendoza,130,131 Italo Mesones,61 Armando Torres-Lezama,119 Ligia Estela Urrego Giraldo,36 Daniel Villarreal,56 Roderick Zagt,132 Miguel N. Alexiades,133 Edmar Almeida de Oliveira,4 Karina

*Garcia-Cabrera,94 Lionel Hernandez,42 Walter Palacios Cuenca,134 Susamar Pansini,30 Daniela Pauletto,135 Freddy Ramirez Arevalo,136 Adeilza Felipe Sampaio,30 Elvis H. Valderrama Sandoval,137,136 Luis Valenzuela Gamarra,23 Aurora Levesley,12 Georgia Pickavance,12 Karina Melgaço,12*

- 1Biodiversity Dynamics, Naturalis Biodiversity Center, PO Box 9517, Leiden, 2300 RA, The Netherlands
- 2Systems Ecology, Free University, De Boelelaan 1087, Amsterdam, 1081 HV, The Netherlands
- 3Department of Biological Sciences, Humboldt State University, 1 Harpst Street, Arcata, CA, 95521, USA
- 4Programa de Pós-Graduação em Ecologia e Conservação, Universidade do Estado de Mato Grosso, Nova Xavantina, MT, Brazil
- 5Department of Ecological Modelling, Helmholtz Centre for Environmental Research - UFZ, Permoserstr. 15, Leipzig, 4318, Germany
- 6Institute of Forest Growth and Computer Sciences, Technische Universität Dresden, Postfach 1117, Tharandt, 1735, Germany
- 7AMAP, IRD, Cirad, CNRS, INRA, Université de Montpellier, TA A-51/PS2, Bd. de la Lironde, Montpellier, F-34398, France. A comprehensive
- 8Coordenação de Biodiversidade, Instituto Nacional de Pesquisas da Amazônia - INPA, Av. André Araújo, 2936, Petrópolis, Manaus, AM, 69067-375, Brazil
- 9Programa Professor Visitante Nacional Sênior na Amazônia - CAPES, Universidade Federal Rural da Amazônia, Av. Perimetral, s/n, Belém, PA, Brazil
- 10Coordenação de Botânica, Museu Paraense Emílio Goeldi, Av. Magalhães Barata 376, C.P. 399, Belém, PA, 66040-170, Brazil
- 11EMBRAPA – Centro de Pesquisa Agroflorestal de Roraima, BR 174, km 8 – Distrito Industrial, Boa Vista, RR, 69301-970, Brazil
- 12School of Geography, University of Leeds, Woodhouse Lane, Leeds, LS2 9JT, UK
- 13Grupo de Investigación en Biodiversidad, Medio Ambiente y Salud-BIOMAS, Universidad de las Américas, Campus Queri, Quito, Ecuador
- 14Keller Science Action Center, The Field Museum, 1400 S. Lake Shore Drive, Chicago, IL, 60605-2496, USA
- 15Departamento de Botânica, Instituto de Pesquisas Científicas e Tecnológicas do Amapá - IEPA, Rodovia JK, Km 10, Campus do IEPA da Fazendinha, Amapá, 68901-025, Brazil
- 16Herbario Amazónico Colombiano, Instituto SINCHI, Calle 20 No 5-44, Bogotá, DC, Colombia
- 17Coordenação de Pesquisas em Ecologia, Instituto Nacional de Pesquisas da Amazônia - INPA, Av. André Araújo, 2936, Petrópolis, Manaus, AM, 69067-375, Brazil
- 18Dep. of Wetland Ecology, Institute of Geography and Geoecology, Karlsruhe Institute of Technology - KIT, Josefstr.1, Rastatt, D-76437, Germany
- 19Biogeochemistry, Max Planck Institute for Chemistry, Hahn-Meitner Weg 1, Mainz, 55128, Germany
- 20Naturalis Biodiversity Center, PO Box 9517, Leiden, 2300 RA, The Netherlands
- 21Coordenação de Dinâmica Ambiental, Instituto Nacional de Pesquisas da Amazônia - INPA, Av. André Araújo, 2936, Petrópolis, Manaus, AM, 69067-375, Brazil
- 22Science and Education, The Field Museum, 1400 S. Lake Shore Drive, Chicago, IL, 60605-2496, USA
- 23Jardín Botánico de Missouri, Oxapampa, Pasco, Peru
- 24Departamento de Ecologia, Universidade Estadual Paulista - UNESP – Instituto de Biociências – IB, Av. 24 A, 1515, Bela Vista, Rio Claro, SP, 13506-900, Brazil
- 25Divisao de Sensoriamento Remoto – DSR, Instituto Nacional de Pesquisas Espaciais – INPE, Av. dos Astronautas, 1758, Jardim da Granja, São José dos Campos, SP, 12227-010, Brazil
- 26Herbario Vargas, Universidad Nacional de San Antonio Abad del Cusco, Avenida de la Cultura, Nro 733, Cusco, Cuzco, Peru
- 27Departamento de Geografia, Universidade Estadual Paulista -UNESP – Instituto de Geociências e Ciências Exatas – IGCE, Bela Vista, Rio Claro, SP, 13506-900, Brazil
- 28Centro de Biociências, Departamento de Ecologia, Universidade Federal do Rio Grande do Norte, Av. Senador Salgado Filho, 3000, Natal, RN, 59072-970, Brazil
- 29Departamento de Biologia, Universidade Federal de Rondônia, Rodovia BR 364 s/n Km 9,5 - Sentido Acre, Unir, Porto Velho, RO, 76.824-027, Brazil
- 30Programa de Pós- Graduação em Biodiversidade e Biotecnologia PPG- Bionorte, Universidade Federal de Rondônia, Campus Porto Velho Km 9,5 bairro Rural, Porto Velho, RO, 76.824-027, Brazil
- 31Department of Biology and Florida Museum of Natural History, University of Florida, Gainesville, FL, 32611, USA
- 32Centre for Tropical Environmental and Sustainability Science and College of Science and Engineering, James Cook University, Cairns, Queensland, 4870, Australia
- 33Instituto de Investigaciones de la Amazonía Peruana (IIAP), Av. A. Quiñones km 2,5, Iquitos, Loreto, 784, Peru
- 34Instituto Boliviano de Investigación Forestal, Av. 6 de agosto #28, Km. 14, Doble via La Guardia, Casilla 6204, Santa Cruz, Santa Cruz, Bolivia
- 35Geography, College of Life and Environmental Sciences, University of Exeter, Rennes Drive, Exeter, EX4 4RJ, UK
- 36Departamento de Ciencias Forestales, Universidad Nacional de Colombia, Calle 64 x Cra 65, Medellín, Antioquia, 1027, Colombia
- 37Agteca-Amazonica, Santa Cruz, Bolivia
- 38Facultad de Ciencias Agrícolas, Universidad Autónoma Gabriel René Moreno, Santa Cruz, Santa Cruz, Bolivia
- 39Natural History Museum, University of Oslo, Postboks 1172, Oslo, 318, Norway
- 40International Center for Tropical Botany (ICTB) Department of Biological Sciences, Florida International University, 11200 SW 8th Street, OE 243, Miami, FL, 33199, USA
- 41Cirad UMR Ecofog, AgrosParisTech,CNRS,INRA,Univ Guyane, Campus agronomique, Kourou Cedex, 97379, France
- 42Centro de Investigaciones Ecológicas de Guayana, Universidad Nacional Experimental de Guayana, Calle Chile, urbaniz Chilemex, Puerto Ordaz, Bolívar, Venezuela
- 43Prédio da Botânica e Ecologia, Embrapa Recursos Genéticos e Biotecnologia, Parque Estação Biológica, Av. W5 Norte, Brasília, DF, 70770-917, Brazil
- 44Projeto Dinâmica Biológica de Fragmentos Florestais, Instituto Nacional de Pesquisas da Amazônia - INPA, Av. André Araújo, 2936, Petrópolis, Manaus, AM, 69067-375, Brazil
- 45Laboratório de Ecologia de Doenças Transmissíveis da Amazônia (EDTA), Instituto Leônidas e Maria Deane, Fiocruz, Rua Terezina, 476, Adrianópolis, Manaus, AM, 69060-001, Brazil
- 46Programa de Pós-graduação em Biodiversidade e Saúde, Instituto Oswaldo Cruz - IOC/FIOCRUZ, Pav. Arthur Neiva – Térreo, Av. Brasil, 4365 – Manguinhos, Rio de Janeiro, RJ, 21040-360, Brazil

47Instituto de Ciências Biológicas, Universidade Federal do Pará, Av. Augusto Corrêa 01, Belém, PA, 66075-110, Brazil  
48Programa de Pós-Graduação em Ecologia, Universidade Federal do Pará, Av. Augusto Corrêa 01, Belém, PA, 66075-110, Brazil  
49Embrapa Amazônia Oriental, Trav. Dr. Enéas Pinheiro s/nº, Belém, PA, 66095-100, Brazil  
50Diretoria Técnico-Científica, Instituto de Desenvolvimento Sustentável Mamirauá, Estrada do Bexiga, 2584, Tefé, AM, 69470-000, Brazil  
51Programa de Ciencias del Agro y el Mar, Herbario Universitario (PORT), UNELLEZ-Guanare, Guanare, Portuguesa, 3350, Venezuela  
52Laboratorio de Ecología de Bosques Tropicales y Primatología, Universidad de los Andes, Carrera 1 # 18a- 10, Bogotá, DC, 111711, Colombia  
53Programa de Pós-Graduação em Biologia (Botânica), Instituto Nacional de Pesquisas da Amazônia - INPA, Av. André Araújo, 2936, Petrópolis, Manaus, AM, 69067-375, Brazil  
54Institute of Biodiversity and Ecosystem Dynamics, University of Amsterdam, Sciencepark 904, Amsterdam, 1098 XH, The Netherlands  
55Endangered Species Coalition, 8530 Geren Rd., Silver Spring, MD, 20901, USA  
56Museo de Historia Natural Noel Kempff Mercado, Universidad Autónoma Gabriel Rene Moreno, Avenida Irala 565 Casilla Post al 2489, Santa Cruz, Santa Cruz, Bolivia  
57Facultad de Ciencias Forestales y Ambientales, Instituto de Investigaciones para el Desarrollo Forestal, Universidad de los Andes, Via Chorros de Milla, 5101, Mérida, Mérida, Venezuela  
58Inventory and Monitoring Program, National Park Service, 120 Chatham Lane, Fredericksburg, VA, 22405, USA  
59Center for Conservation and Sustainability, Smithsonian Conservation Biology Institute, 1100 Jefferson Dr. SW, Suite 3123, Washington, DC, 20560-0705, USA  
60Universidade Federal do Amapá, Ciências Ambientais, Rod. Juscelino Kubitschek km2, Macapá, AP, 68902-280, Brazil  
61Department of Integrative Biology, University of California, Berkeley, CA, 94720-3140, USA  
62Biologia Vegetal, Universidade Estadual de Campinas, Caixa Postal 6109, Campinas, SP, 13.083-970, Brazil  
63Department of Global Ecology, Carnegie Institution for Science, 260 Panama St., Stanford, CA, 94305, USA  
64Institute of Molecular Plant Sciences, University of Edinburgh, Mayfield Rd, Edinburgh, EH3 5LR, UK  
65Tropical Diversity Section, Royal Botanic Garden Edinburgh, 20a Inverleith Row, Edinburgh, Scotland, EH3 5LR, UK  
66Department of Ecology, University of Brasília, Brasília, DF, 70904-970, Brazil  
67Programa de Pós-Graduação em Ciência Ambientais, Universidade Federal do Pará, Rua Augusto Corrêa 01, Belém, PA, 66075-110, Brazil  
68Faculty of Natural Sciences, Department of Life Sciences, Imperial College London, Silwood Park, South Kensington Campus, London, SW7 2AZ, UK  
69Ecosistemas, Biodiversidad y Conservación de Especies, Universidad Estatal Amazónica, Km. 2 1/2 vía a Tena (Paso Lateral), Puyo, Pastaza, Ecuador  
70Universidade Federal de Minas Gerais, Instituto de Ciências Biológicas, Departamento de Genética, Ecologia e Evolução, Av. Antônio Carlos, 6627 Pampulha, Belo Horizonte, MG, 31270-901, Brazil  
71Department of Biology, University of Miami, Coral Gables, FL, 33146, USA  
72Fairchild Tropical Botanic Garden, Coral Gables, FL, 33156, USA  
73Diretoria de Pesquisas Científicas, Instituto de Pesquisas Jardim Botânico do Rio de Janeiro, Rio de Janeiro, RJ, Brazil  
74Instituto de Biociências - Dept. Ecologia, Universidade de Sao Paulo - USP, Rua do Matão, Trav. 14, no. 321, Cidade Universitária, São Paulo, SP, 05508-090, Brazil  
75Lancaster Environment Centre, Lancaster University, Lancaster, Lancashire, LA1 4YQ, UK  
76Environmental Change Institute, University of Oxford, Oxford, Oxfordshire, OX1 3QY, UK  
77Empresa Brasileira de Pesquisa Agropecuária, Embrapa Amapá, Rod. Juscelino Kubitschek km 5, Macapá, Amapá, 68903-419, Brazil  
78Grupo de Investigación en Tecnologías de la Información y Medio Ambiente, Instituto Tecnológico de Antioquia - Institución Universitaria, Calle 78B No. 72A-220, Medellín, Colombia  
79Universidad Regional Amazónica IKIAM, Km 7 via Muyuna, Tena, Napo, Ecuador  
80Escuela de Biología Herbario Alfredo Paredes, Universidad Central, Ap. Postal 17.01.2177, Quito, Pichincha, Ecuador  
81Taxonomy and Systematics, Naturalis Biodiversity Center, PO Box 9517, Leiden, 2300 RA, The Netherlands  
82Museu Universitário / Centro de Ciências Biológicas e da Natureza / Laboratório de Botânica e Ecologia Vegetal, Universidade Federal do Acre, Rio Branco, AC, 69915-559, Brazil  
83Institute of Biological and Health Sciences, Federal University of Alagoas, Av. Lourival Melo Mota, s/n, Tabuleiro do Martins, Maceio, AL, 57072-970, Brazil  
84Iwokrama International Centre for Rainforest Conservation, Georgetown, Guyana  
85New York Botanical Garden, 2900 Southern Blvd, Bronx, New York, NY, 10458-5126, USA  
86School of Geosciences, University of Edinburgh, 201 Crew Building, King's Buildings, Edinburgh, EH9 3JN, UK  
87Natural Capital and Plant Health, Royal Botanic Gardens, Kew, Richmond, Surrey, TW9 3AB, UK  
88Servicios de Biodiversidad EIRL, Jr. Independencia 405, Iquitos, Loreto, 784, Peru  
89Herbario Nacional de Bolivia, Universitario UMSA, Casilla 10077 Correo Central, La Paz, La Paz, Bolivia  
90Center for Conservation and Sustainable Development, Missouri Botanical Garden, P.O. Box 299, St. Louis, MO, 63166-0299, USA  
91Department for Identification & Naming, Royal Botanic Gardens, Kew, Richmond, Surrey, TW9 3AB, UK  
92Department of Forestry Management, Universidad Nacional Agraria La Molina, Avenida La Molina, Apdo. 456, La Molina, Lima, Peru  
93School of Environmental Sciences, University of East Anglia, Norwich, NR4 7TJ, UK  
94Biology Department and Center for Energy, Environment and Sustainability, Wake Forest University, 1834 Wake Forest Rd, Winston Salem, NC, 27106, USA  
95Laboratoire Evolution et Diversité Biologique, CNRS and Université Paul Sabatier, UMR 5174 EDB, Toulouse, 31000, France  
96Andes to Amazon Biodiversity Program, Madre de Dios, Madre de Dios, Peru  
97Department of Anthropology, University of Texas at Austin, SAC 5.150, 2201 Speedway Stop C3200, Austin, TX, 78712, USA  
98Fundación Puerto Rastrojo, Cra 10 No. 24-76 Oficina 1201, Bogotá, DC, Colombia  
99Colegio de Ciencias Biológicas y Ambientales-COCIBA & Galapagos Institute for the Arts and Sciences-GAIAS, Universidad San Francisco de Quito-USFQ, Quito, Pichincha, Ecuador  
100Department of Wildlife Ecology and Conservation, University of Florida, 110 Newins-Ziegler Hall, Gainesville, FL, 32611, USA  
101Fundación Estación de Biología, Cra 10 No. 24-76 Oficina 1201, Bogotá, DC, Colombia  
102CNHS, Federal University of Mato Grosso, Av. Alexandre Ferronato 1200, Setor Industrial, Sinop, MT, 78.557-267, Brazil  
103Direction régionale de la Guyane, ONF, Cayenne, F-97300, French Guiana

- 104PROTERRA, Instituto de Investigaciones de la Amazonía Peruana (IIAP), Av. A. Quiñones km 2,5, Iquitos, Loreto, 784, Peru
- 105ACEER Foundation, Jirón Cusco N° 370, Puerto Maldonado, Madre de Dios, Peru
- 106Amazon Conservation Team, Doekhieweg Oost #24, Paramaribo, Suriname
- 107Institut de Ciència i Tecnologia Ambientals, Universitat Autònoma de Barcelona, 08193 Bellaterra, Barcelona, Spain
- 108Environmental Change Institute, Oxford University Centre for the Environment, Dyson Perrins Building, South Parks Road, Oxford, England, OX1 3QY, UK
- 109Instituto de Ciencias Naturales, Universidad Nacional de Colombia, Apartado 7945, Bogotá, DC, Colombia
- 110Instituto de Ciência Agrárias, Universidade Federal Rural da Amazônia, Av. Presidente Tancredo Neves 2501, Belém, PA, 66.077-830, Brazil
- 111Escuela Profesional de Ingeniería Forestal, Universidad Nacional de San Antonio Abad del Cusco, Jirón San Martín 451, Puerto Maldonado, Madre de Dios, Peru
- 112Universidad Autónoma del Beni José Ballivián, Campus Universitario Final, Av. Ejercito, Riberalta, Beni, Bolivia
- 113Laboratory of Human Ecology, Instituto Venezolano de Investigaciones Científicas - IVIC, Ado 20632, Caracas, Caracas, 1020A, Venezuela
- 114Cambridge University Botanic Garden, 1 Brookside., Cambridge, CB2 1JE, UK
- 115School of Agriculture and Food Sciences - ARC Centre of Excellence for Environmental Decisions CEED, The University of Queensland, St. Lucia, QLD 4072, Australia
- 116University of Campinas, Plant Biology Department, Rua Monteiro Lobato, 255, Cidade Universitária Zeferino Vaz, Barão Geraldo, Campinas, São Paulo, CEP 13083-862, Brazil
- 117Resource Ecology Group, Wageningen University & Research, Droevendaalsesteeg 3a, Lumen, building number 100, Wageningen, Gelderland, 6708 PB, The Netherlands
- 118Laboratório de Ciências Ambientais, Universidade Estadual do Norte Fluminense, Av. Alberto Lamego 2000, Campos dos Goyatacazes, RJ, 28013-620, Brazil
- 119Instituto de Investigaciones para el Desarrollo Forestal (INDEFOR), Universidad de los Andes, Conjunto Forestal, 5101, Mérida, Mérida, Venezuela
- 120Departamento de Biología, Universidade Federal do Amazonas - UFAM – Instituto de Ciências Biológicas – ICB1, Av General Rodrigo Octavio 6200, Manaus, AM, 69080-900, Brazil
- 121GeolS, El Día 369 y El Telégrafo, 3° Piso, Quito, Pichincha, Ecuador
- 122Department of Biology, University of Maryland, College Park, MD, 20742, USA
- 123University of Nottingham, University Park, Nottingham, NG7 2RD, UK
- 124School of Environmental and Forest Sciences, University of Washington, Seattle, WA, 98195-2100, USA
- 125Environmental Science and Policy, Northern Arizona University, Flagstaff, AZ, 86011, USA
- 126Geography and the Environment, University of Texas at Austin, 305 E. 23rd Street, CLA building, Austin, TX, 78712, USA
- 127Medio Ambiente, PLUSPRETOL, Iquitos, Loreto, Peru
- 128The Mauritius Herbarium, Agricultural Services, Ministry of Agro-Industry and Food Security, Reduit, 80835, Mauritius
- 129Department of Bioscience, Aarhus University, Building 1540 Ny Munkegade, Aarhus C, Aarhus, DK-8000, Denmark
- 130FOMABO, Manejo Forestal en las Tierras Tropicales de Bolivia, Sacta, Cochabamba, Bolivia
- 131Escuela de Ciencias Forestales (ESFOR), Universidad Mayor de San Simon (UMSS), Sacta, Cochabamba, Bolivia
- 132Tropenbos International, Lawickse Allee 11 PO Box 232, Wageningen, 6700 AE, The Netherlands
- 133School of Anthropology and Conservation, University of Kent, Marlowe Building, Canterbury, Kent, CT2 7NR, UK
- 134Herbario Nacional del Ecuador, Universidad Técnica del Norte, Quito, Pichincha, Ecuador
- 135Instituto de Biodiversidade e Floresta, Universidade Federal do Oeste do Pará, Rua Vera Paz, Campus Tapajós, Santarém, PA, 68015-110, Brazil
- 136Facultad de Biología, Universidad Nacional de la Amazonia Peruana, Pevas 5ta cdra, Iquitos, Loreto, Peru
- 137Department of Biology, University of Missouri, St. Louis, MO, 63121, USA

Correspondence and requests for materials should be addressed to H.t.S. (email: [hans.tersteegge@naturalis.nl](mailto:hans.tersteegge@naturalis.nl))

## ATDN plots, n = 1946

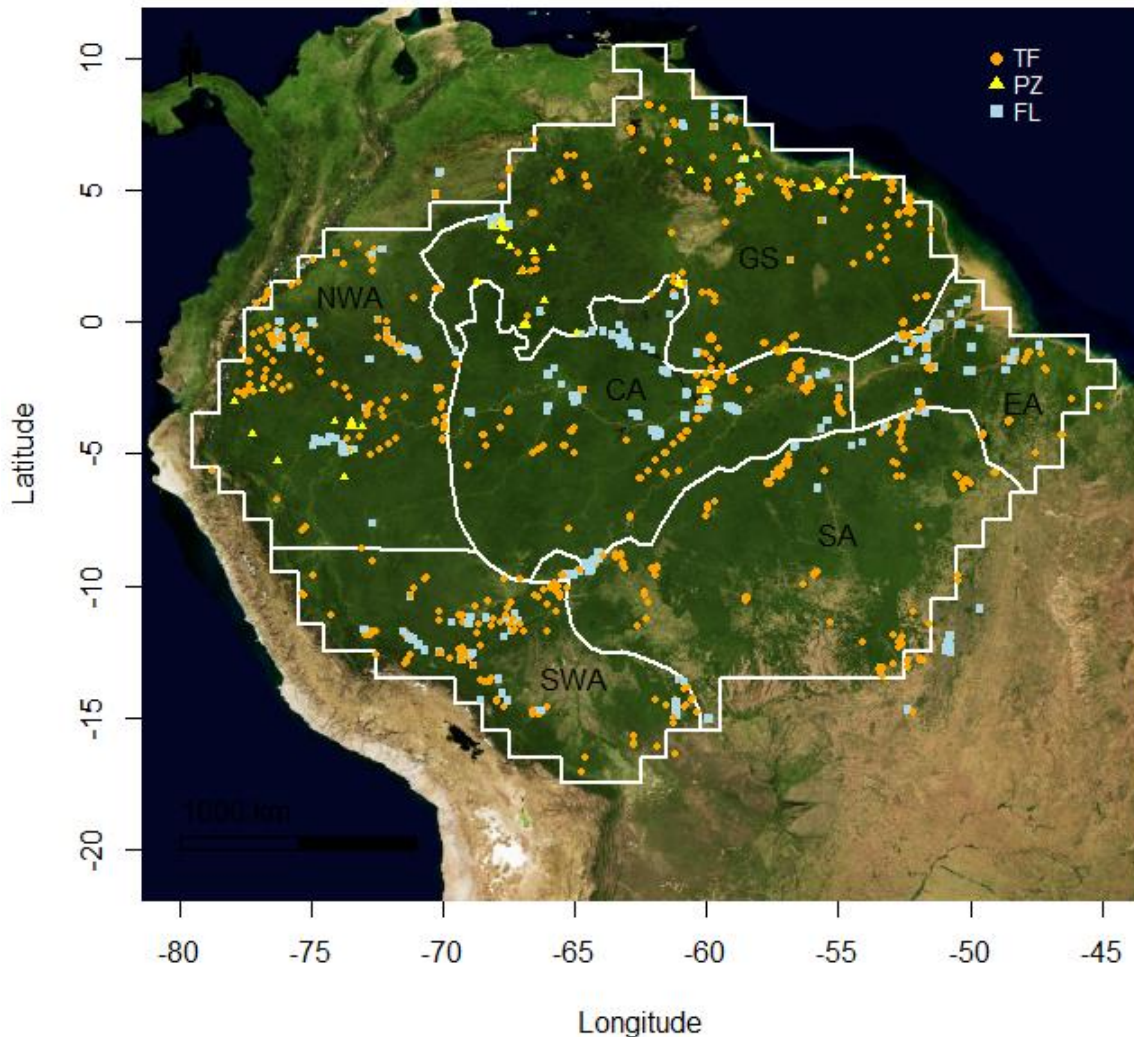

**Figure S1. Map of Amazonia showing the location of the 1,946 Amazon Tree Diversity Network (ATDN) plots that contributed data to this paper.** The white polygon marks our delimitation of the study area and consists of 567 1° grid cells (area = 6.29 million km<sup>2</sup>). Orange circles indicate plots on *terra firme*; blue squares, plots on seasonally or permanently flooded terrain (*várzea*, *igapó*, swamps); yellow triangles, plots on white-sand podzols; gray circles, plots only used for tree density calculations. Background is from Visible Earth. Regions: CA, central Amazonia; EA, eastern Amazonia; GS, Guiana Shield; SA, southern Amazonia; WAN, northwestern Amazonia; WAS, southwestern Amazonia. Map created with custom R<sup>1</sup> script. Base map source (country.shp, rivers.shp): ESRI (<http://www.esri.com/data/basemaps>, © Esri, DeLorme Publishing Company). Background: Visible Earth NASA <sup>2</sup> (<https://visibleearth.nasa.gov/useterms.php> © NASA).

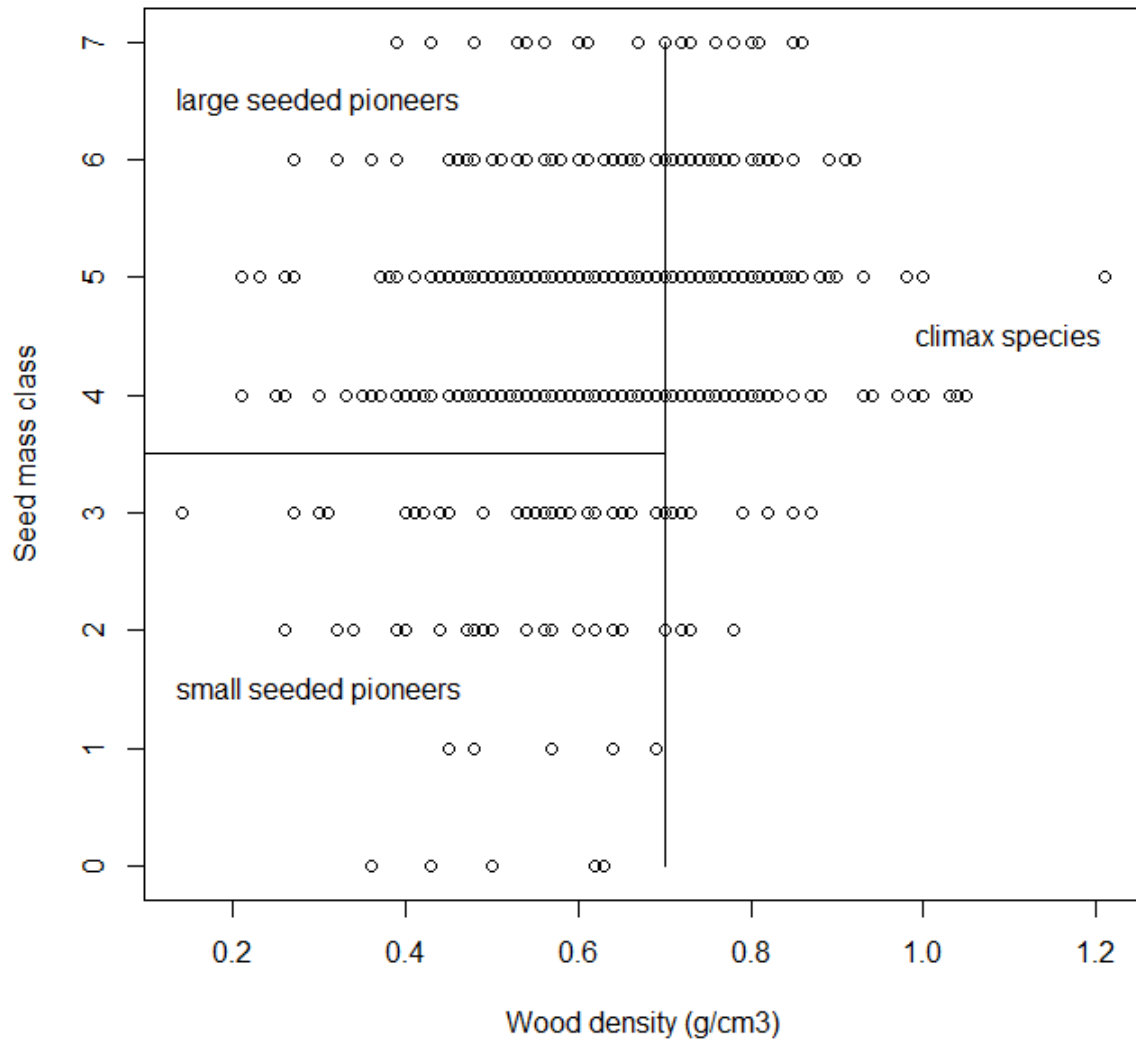

**Figure S2.** Wood density and seed mass class of all genera found in the plots used for this study.

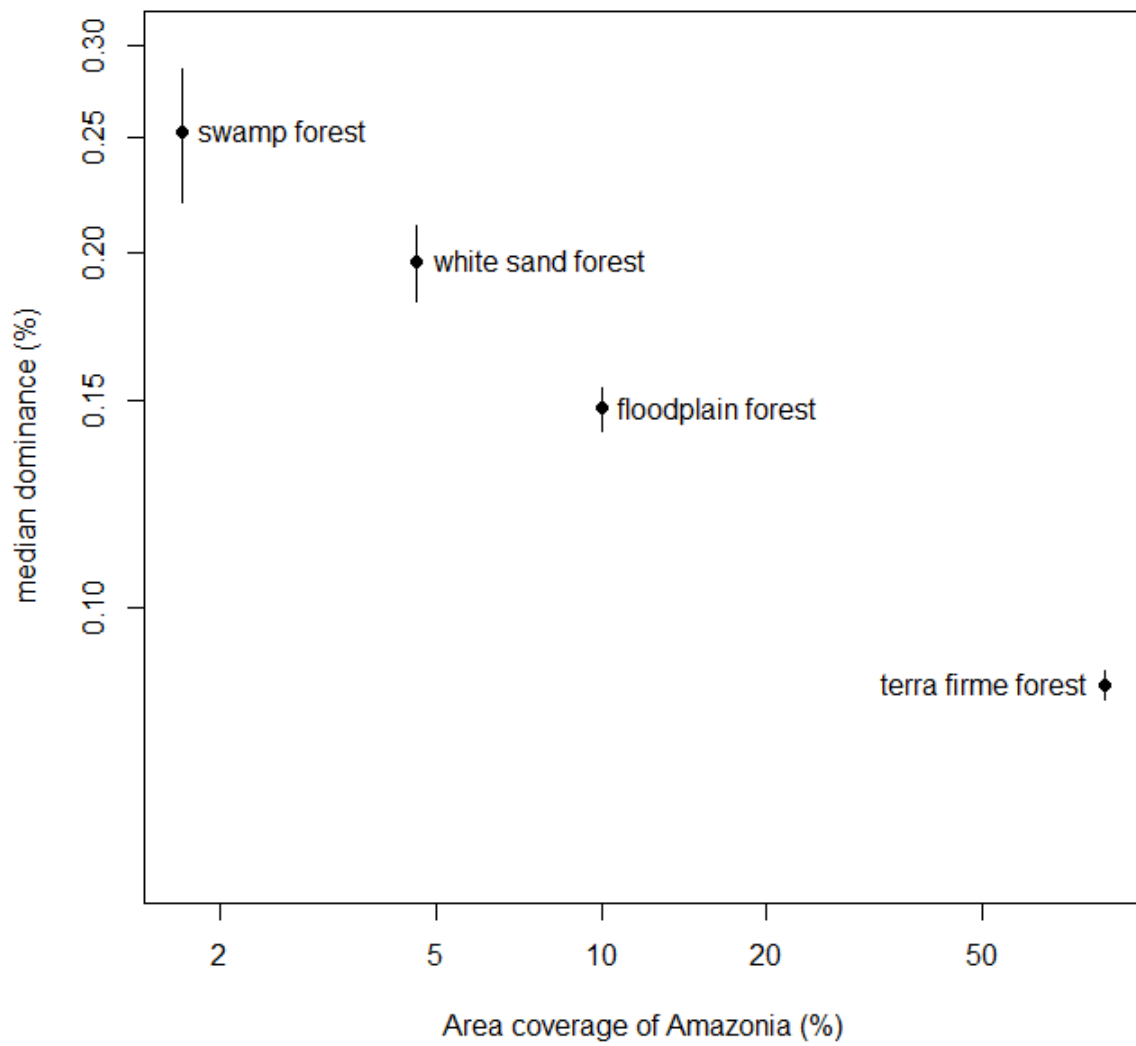

**Figure S5.** Median dominance of the four main Amazonian forest types by surface area coverage of Amazonia. Bars indicate se ( $sd/\sqrt{n}$ ).

## References

- 1 R: A language and environment for statistical computing (R Foundation for Statistical Computing, Vienna, Austria, 2017).
- 2 Stöckli, R., Vermote, E., Saleous, N., Simmon, R. & Herring, D. The Blue Marble Next Generation - A true color earth dataset including seasonal dynamics from MODIS. (NASA Earth Observatory, 2005).



## Consortia

### ATDN (Amazon Tree Diversity Network)

*Luiz de Souza Coelho,8 Diogenes de Andrade Lima Filho,8 Rafael P. Salomão,9,10 Iêda Leão Amaral,8 Francisca Dionízia de Almeida Matos,8 Carolina V. Castilho,11 Oliver L. Phillips,12 Juan Ernesto Guevara,13,14 Marcelo de Jesus Veiga Carim,15 Dairon Cárdenas López,16 William E. Magnusson,17 Florian Wittmann,18,19 Mariana Victória Irueme,8 Maria Pires Martins,8 José Renan da Silva Guimarães,15 Jean-François Molino,7 Olaf S. Bánki,20 Maria Teresa Fernandez Piedade,21 Nigel C.A. Pitman,22 Abel Monteagudo Mendoza,23 José Ferreira Ramos,8 Bruno Garcia Luize,24 Evelyn Márcia Moraes de Leão Novo,25 Percy Núñez Vargas,26 Thiago Sanna Freire Silva,27 Eduardo Martins Venticinquete,28 Angelo Gilberto Manzatto,29 Neidiane Farias Costa Reis,30 John Terborgh,31,32 Katia Regina Casula,30 Euridice N. Honorio Coronado,33,12 Juan Carlos Montero,34,8 Ted R. Feldpausch,35,12 Alvaro Duque,36 Flávia R.C. Costa,8 Nicolás Castaño Arboleda,16 Jochen Schöngart,21 Timothy J. Killeen,37 Rodolfo Vasquez,23 Bonifacio Mostacedo,38 Layon O. Demarchi,21 Rafael L. Assis,39 Chris Baraloto,40 Julien Engel,7,40 Pascal Petronelli,41 Hernán Castellanos,42 Marcelo Brilhante de Medeiros,43 Adriano Quaresma,21 Marcelo Fragomeni Simon,43 Ana Andrade,44 José Luís Camargo,44 Susan G.W. Laurance,32 William F. Laurance,32 Lorena M. Rincón,8 Juliana Schietti,8 Thaiane R. Sousa,8 Emanuelle de Sousa Farias,45,46 Maria Aparecida Lopes,47 José Leonardo Lima Magalhães,48,49 Henrique Eduardo Mendonça Nascimento,8 Helder Lima de Queiroz,50 Gerardo A. Aymard C.,51 Roel Brienen,12 Juan David Cardenas Revilla,8 Ima Célia Guimarães Vieira,10 Bruno Barçante Ladvocat Cintra,21,12 Pablo R. Stevenson,52 Yuri Oliveira Feitosa,53 Joost F. Duivenvoorden,54 Hugo F. Mogollón,55 Alejandro Araujo-Murakami,56 Leandro Valle Ferreira,10 José Rafael Lozada,57 James A. Comiskey,58,59 José Julio de Toledo,60 Gabriel Damasco,61 Nállarett Dávila,62 Freddie Draper,63,40 Roosevelt García-Villacorta,64,65 Aline Lopes,21,66 Alberto Vicentini,17 Alfonso Alonso,59 Francisco Dallmeier,59 Vitor H.F. Gomes,10,67 Jon Lloyd,68 David Neill,69 Daniel Praia Portela de Aguiar,21 Luzmila Arroyo,56 Fernanda Antunes Carvalho,17,70 Fernanda Coelho de Souza,17,12 Dário Dantas do Amaral,10 Kenneth J. Feeley,71,72 Rogerio Gribel,73 Marcelo Petratti Pansonato,8,74 Jos Barlow,75 Erika Berenguer,76 Joice Ferreira,49 Paul V.A. Fine,61 Marcelino Carneiro Guedes,77 Eliana M. Jimenez,78 Juan Carlos Licona,34 Maria Cristina Peñuela Mora,79 Boris Villa,21 Carlos Cerón,80 Paul Maas,81 Marcos Silveira,82 Juliana Stropp,83 Raquel Thomas-Caesar,84 Tim R. Baker,12 Doug Daly,85 Kyle G. Dexter,86,65 Isau Huamantupa-Chuquimaco,26 William Milliken,87 Toby Pennington,35,65 Marcos Ríos Paredes,88 Alfredo Fuentes,89,90 Bente Klitgaard,91 José Luis Marcelo Pena,92 Carlos A. Peres,93 Miles R. Silman,94 J. Sebastián Tello,90 Jerome Chave,95 Fernando Cornejo Valverde,96 Anthony Di Fiore,97 Renato Richard Hilário,60 Juan Fernando Phillips,98 Gonzalo Rivas-Torres,99,100 Tinde R. van Andel,1 Patricio von Hildebrand,101 Janaína Costa Noronha,102 Edelcilio Marques Barbosa,8 Flávia Rodrigues Barbosa,102 Luiz Carlos de Matos Bonates,8 Rainiellen de Sá Carpanedo,102 Hilda Paulette Dávila Doza,88 Émile Fonty,103,7 Ricardo Zárate Gómez,104 Therany Gonzales,105 George Pepe Gallardo Gonzales,88 Bruce Hoffman,106 André Braga Junqueira,107 Yadvinder Malhi,108 Ires Paula de Andrade Miranda,8 Linder Felipe Mozombite Pinto,88 Adriana Prieto,109 Domingos de Jesus Rodrigues,102 Agustín Rudas,109 Ademir R. Ruschel,49 Natalino Silva,110 César I.A. Vela,111 Vincent Antoine Vos,112 Egleé L. Zent,113 Stanford Zent,113 Bianca Weiss Albuquerque,21 Angela Cano,52,114 Yrma Andreina Carrero Márquez,57 Diego F. Correa,52,115 Janaina Barbosa Pedrosa Costa,77 Bernardo Monteiro Flores,116 David Galbraith,12 Milena Holmgren,117 Michelle Kalamandeen,12 Marcelo Trindade Nascimento,118 Alexandre A. Oliveira,74 Hirna Ramirez-Angulo,119 Maira Rocha,21 Veridiana Vizoni Scudeller,120 Rodrigo Sierra,121 Milton Tirado,121 Maria Natalia Umaña Medina,52,122 Geertje van der Heijden,123 Emilio Vilanova Torre,119,124 Corine Vriesendorp,22 Ophelia Wang,125 Kenneth R. Young,126 Manuel Augusto Ahuite Reategui,127 Cláudia Baidier,128,74 Henrik Balslev,129 Sasha Cárdenas,52 Luisa Fernanda Casas,52 William Farfan-Rios,94 Cid Ferreira,8 Reynaldo Linares-Palomino,59 Casimiro Mendoza,130,131 Italo Mesones,61 Armando Torres-Lezama,119 Ligia Estela Urrego Giraldo,36 Daniel Villarroel,56 Roderick Zagt,132 Miguel N. Alexiades,133 Edmar Almeida de Oliveira,4 Karina Garcia-Cabrera,94 Lionel Hernandez,42 Walter Palacios Cuenca,134 Susamar Pansini,30 Daniela Pauletto,135*

*Freddy Ramirez Arevalo,136 Adeilza Felipe Sampaio,30 Elvis H. Valderrama Sandoval,137,136 Luis Valenzuela Gamarra,23 Aurora Levesley,12 Georgia Pickavance,12 Karina Melgaço,12*

8Coordenação de Biodiversidade, Instituto Nacional de Pesquisas da Amazônia - INPA, Av. André Araújo, 2936, Petrópolis, Manaus, AM, 69067-375, Brazil

9Programa Professor Visitante Nacional Sênior na Amazônia - CAPES, Universidade Federal Rural da Amazônia, Av. Perimetral, s/n, Belém, PA, Brazil

10Coordenação de Botânica, Museu Paraense Emílio Goeldi, Av. Magalhães Barata 376, C.P. 399, Belém, PA, 66040-170, Brazil

11EMBRAPA – Centro de Pesquisa Agroflorestal de Roraima, BR 174, km 8 – Distrito Industrial, Boa Vista, RR, 69301-970, Brazil

12School of Geography, University of Leeds, Woodhouse Lane, Leeds, LS2 9JT, UK

13Grupo de Investigación en Biodiversidad, Medio Ambiente y Salud-BIOMAS, Universidad de las Américas, Campus Queri, Quito, Ecuador

14Keller Science Action Center, The Field Museum, 1400 S. Lake Shore Drive, Chicago, IL, 60605-2496, USA

15Departamento de Botânica, Instituto de Pesquisas Científicas e Tecnológicas do Amapá - IEPA, Rodovia JK, Km 10, Campus do IEPA da Fazendinha, Amapá, 68901-025, Brazil

16Herbario Amazónico Colombiano, Instituto SINCHI, Calle 20 No 5-44, Bogotá, DC, Colombia

17Coordenação de Pesquisas em Ecologia, Instituto Nacional de Pesquisas da Amazônia - INPA, Av. André Araújo, 2936, Petrópolis, Manaus, AM, 69067-375, Brazil

18Dep. of Wetland Ecology, Institute of Geography and Geoecology, Karlsruhe Institute of Technology - KIT, Josefstr.1, Rastatt, D-76437, Germany

19Biogeochemistry, Max Planck Institute for Chemistry, Hahn-Meitner Weg 1, Mainz, 55128, Germany

20Naturalis Biodiversity Center, PO Box 9517, Leiden, 2300 RA, The Netherlands

21Coordenação de Dinâmica Ambiental, Instituto Nacional de Pesquisas da Amazônia - INPA, Av. André Araújo, 2936, Petrópolis, Manaus, AM, 69067-375, Brazil

22Science and Education, The Field Museum, 1400 S. Lake Shore Drive, Chicago, IL, 60605-2496, USA

23Jardín Botánico de Missouri, Oxapampa, Pasco, Peru

24Departamento de Ecologia, Universidade Estadual Paulista - UNESP – Instituto de Biociências – IB, Av. 24 A, 1515, Bela Vista, Rio Claro, SP, 13506-900, Brazil

25Divisao de Sensoriamento Remoto – DSR, Instituto Nacional de Pesquisas Espaciais – INPE, Av. dos Astronautas, 1758, Jardim da Granja, São José dos Campos, SP, 12227-010, Brazil

26Herbario Vargas, Universidad Nacional de San Antonio Abad del Cusco, Avenida de la Cultura, Nro 733, Cusco, Cuzco, Peru

27Departamento de Geografia, Universidade Estadual Paulista -UNESP – Instituto de Geociências e Ciências Exatas – IGCE, Bela Vista, Rio Claro, SP, 13506-900, Brazil

28Centro de Biociências, Departamento de Ecologia, Universidade Federal do Rio Grande do Norte, Av. Senador Salgado Filho, 3000 , Natal, RN, 59072-970, Brazil

29Departamento de Biologia, Universidade Federal de Rondônia, Rodovia BR 364 s/n Km 9,5 - Sentido Acre, Unir, Porto Velho, RO, 76.824-027, Brazil

30Programa de Pós- Graduação em Biodiversidade e Biotecnologia PPG- Bionorte, Universidade Federal de Rondônia, Campus Porto Velho Km 9,5 bairro Rural, Porto Velho, RO, 76.824-027, Brazil

31Department of Biology and Florida Museum of Natural History, University of Florida, Gainesville, FL, 32611, USA

- 32Centre for Tropical Environmental and Sustainability Science and College of Science and Engineering, James Cook University, Cairns, Queensland, 4870, Australia
- 33Instituto de Investigaciones de la Amazonía Peruana (IIAP), Av. A. Quiñones km 2,5, Iquitos, Loreto, 784, Peru
- 34Instituto Boliviano de Investigación Forestal, Av. 6 de agosto #28, Km. 14, Doble via La Guardia, Casilla 6204, Santa Cruz, Santa Cruz, Bolivia
- 35Geography, College of Life and Environmental Sciences, University of Exeter, Rennes Drive, Exeter, EX4 4RJ, UK
- 36Departamento de Ciencias Forestales, Universidad Nacional de Colombia, Calle 64 x Cra 65, Medellín, Antioquia, 1027, Colombia
- 37Agteca-Amazonica, Santa Cruz, Bolivia
- 38Facultad de Ciencias Agrícolas, Universidad Autónoma Gabriel René Moreno, Santa Cruz, Santa Cruz, Bolivia
- 39Natural History Museum, University of Oslo, Postboks 1172, Oslo, 318, Norway
- 40International Center for Tropical Botany (ICTB) Department of Biological Sciences, Florida International University, 11200 SW 8th Street, OE 243, Miami, FL, 33199, USA
- 41Cirad UMR Ecofog, AgrosParisTech,CNRS,INRA,Univ Guyane, Campus agronomique, Kourou Cedex, 97379, France
- 42Centro de Investigaciones Ecológicas de Guayana, Universidad Nacional Experimental de Guayana, Calle Chile, urbaniz Chilemex, Puerto Ordaz, Bolivar, Venezuela
- 43Prédio da Botânica e Ecologia, Embrapa Recursos Genéticos e Biotecnologia, Parque Estação Biológica, Av. W5 Norte, Brasília, DF, 70770-917, Brazil
- 44Projeto Dinâmica Biológica de Fragmentos Florestais, Instituto Nacional de Pesquisas da Amazônia - INPA, Av. André Araújo, 2936, Petrópolis, Manaus, AM, 69067-375, Brazil
- 45Laboratório de Ecologia de Doenças Transmissíveis da Amazônia (EDTA), Instituto Leônidas e Maria Deane, Fiocruz, Rua Terezina, 476, Adrianópolis, Manaus, AM, 69060-001, Brazil
- 46Programa de Pós-graduação em Biodiversidade e Saúde, Instituto Oswaldo Cruz - IOC/FIOCRUZ, Pav. Arthur Neiva – Térreo, Av. Brasil, 4365 – Manguinhos, Rio de Janeiro, RJ, 21040-360, Brazil
- 47Instituto de Ciências Biológicas, Universidade Federal do Pará, Av. Augusto Corrêa 01, Belém, PA, 66075-110, Brazil
- 48Programa de Pós-Graduação em Ecologia, Universidade Federal do Pará, Av. Augusto Corrêa 01, Belém, PA, 66075-110, Brazil
- 49Embrapa Amazônia Oriental, Trav. Dr. Enéas Pinheiro s/nº, Belém, PA, 66095-100, Brazil
- 50Diretoria Técnico-Científica, Instituto de Desenvolvimento Sustentável Mamirauá, Estrada do Bexiga, 2584, Tefé, AM, 69470-000, Brazil
- 51Programa de Ciencias del Agro y el Mar, Herbario Universitario (PORT), UNELLEZ-Guanare, Guanare, Portuguesa, 3350, Venezuela
- 52Laboratorio de Ecología de Bosques Tropicales y Primatología, Universidad de los Andes, Carrera 1 # 18a- 10, Bogotá, DC, 111711, Colombia
- 53Programa de Pós-Graduação em Biologia (Botânica), Instituto Nacional de Pesquisas da Amazônia - INPA, Av. André Araújo, 2936, Petrópolis, Manaus, AM, 69067-375, Brazil
- 54Institute of Biodiversity and Ecosystem Dynamics, University of Amsterdam, Sciencepark 904, Amsterdam, 1098 XH, The Netherlands
- 55Endangered Species Coalition, 8530 Geren Rd., Silver Spring, MD, 20901, USA
- 56Museo de Historia Natural Noel Kempff Mercado, Universidad Autónoma Gabriel Rene Moreno, Avenida Irala 565 Casilla Post al 2489, Santa Cruz, Santa Cruz, Bolivia
- 57Facultad de Ciencias Forestales y Ambientales, Instituto de Investigaciones para el Desarrollo Forestal, Universidad de los Andes, Via Chorros de Milla, 5101, Mérida, Mérida, Venezuela
- 58Inventory and Monitoring Program, National Park Service, 120 Chatham Lane, Fredericksburg, VA, 22405, USA

59Center for Conservation and Sustainability, Smithsonian Conservation Biology Institute, 1100 Jefferson Dr. SW, Suite 3123, Washington, DC, 20560-0705, USA

60Universidade Federal do Amapá, Ciências Ambientais, Rod. Juscelino Kubitschek km2, Macapá, AP, 68902-280, Brazil

61Department of Integrative Biology, University of California, Berkeley, CA, 94720-3140, USA

62Biologia Vegetal, Universidade Estadual de Campinas, Caixa Postal 6109, Campinas, SP, 13.083-970, Brazil

63Department of Global Ecology, Carnegie Institution for Science, 260 Panama St., Stanford, CA, 94305, USA

64Institute of Molecular Plant Sciences, University of Edinburgh, Mayfield Rd, Edinburgh, EH3 5LR, UK

65Tropical Diversity Section, Royal Botanic Garden Edinburgh, 20a Inverleith Row, Edinburgh, Scotland, EH3 5LR, UK

66Department of Ecology, University of Brasília, Brasília, DF, 70904-970, Brazil

67Programa de Pós-Graduação em Ciência Ambientais, Universidade Federal do Pará, Rua Augusto Corrêa 01, Belém, PA, 66075-110, Brazil

68Faculty of Natural Sciences, Department of Life Sciences, Imperial College London, Silwood Park, South Kensington Campus, London, SW7 2AZ, UK

69Ecosistemas, Biodiversidad y Conservación de Especies, Universidad Estatal Amazónica, Km. 2 1/2 vía a Tena (Paso Lateral), Puyo, Pastaza, Ecuador

70Universidade Federal de Minas Gerais, Instituto de Ciências Biológicas, Departamento de Genética, Ecologia e Evolução, Av. Antônio Carlos, 6627 Pampulha, Belo Horizonte, MG, 31270-901, Brazil

71Department of Biology, University of Miami, Coral Gables, FL, 33146, USA

72Fairchild Tropical Botanic Garden, Coral Gables, FL, 33156, USA

73Diretoria de Pesquisas Científicas, Instituto de Pesquisas Jardim Botânico do Rio de Janeiro, Rio de Janeiro, RJ, Brazil

74Instituto de Biociências - Dept. Ecologia, Universidade de Sao Paulo - USP, Rua do Matão, Trav. 14, no. 321, Cidade Universitária, São Paulo, SP, 05508-090, Brazil

75Lancaster Environment Centre, Lancaster University, Lancaster, Lancashire, LA1 4YQ, UK

76Environmental Change Institute, University of Oxford, Oxford, Oxfordshire, OX1 3QY, UK

77Empresa Brasileira de Pesquisa Agropecuária, Embrapa Amapá, Rod. Juscelino Kubitschek km 5, Macapá, Amapá, 68903-419, Brazil

78Grupo de Investigación en Tecnologías de la Información y Medio Ambiente, Instituto Tecnológico de Antioquia - Institución Universitaria, Calle 78B No. 72A-220, Medellín, Colombia

79Universidad Regional Amazónica IKIAM, Km 7 via Muyuna, Tena, Napo, Ecuador

80Escuela de Biología Herbario Alfredo Paredes, Universidad Central, Ap. Postal 17.01.2177, Quito, Pichincha, Ecuador

81Taxonomy and Systematics, Naturalis Biodiversity Center, PO Box 9517, Leiden, 2300 RA, The Netherlands

82Museu Universitário / Centro de Ciências Biológicas e da Natureza / Laboratório de Botânica e Ecologia Vegetal, Universidade Federal do Acre, Rio Branco, AC, 69915-559, Brazil

83Institute of Biological and Health Sciences, Federal University of Alagoas, Av. Lourival Melo Mota, s/n, Tabuleiro do Martins, Maceio, AL, 57072-970, Brazil

84Iwokrama International Programme for Rainforest Conservation, Georgetown, Guyana

85New York Botanical Garden, 2900 Southern Blvd, Bronx, New York, NY, 10458-5126, USA

86School of Geosciences, University of Edinburgh, 201 Crew Building, King's Buildings, Edinburgh, EH9 3JN, UK

87Natural Capital and Plant Health, Royal Botanic Gardens, Kew, Richmond, Surrey, TW9 3AB, UK

- 88Servicios de Biodiversidad EIRL, Jr. Independencia 405, Iquitos, Loreto, 784, Peru
- 89Herbario Nacional de Bolivia, Universitario UMSA, Casilla 10077 Correo Central, La Paz, La Paz, Bolivia
- 90Center for Conservation and Sustainable Development, Missouri Botanical Garden, P.O. Box 299, St. Louis, MO, 63166-0299, USA
- 91Department for Identification & Naming, Royal Botanic Gardens, Kew, Richmond, Surrey, TW9 3AB, UK
- 92Department of Forestry Management, Universidad Nacional Agraria La Molina, Avenida La Molina, Apdo. 456, La Molina, Lima, Peru
- 93School of Environmental Sciences, University of East Anglia, Norwich, NR4 7TJ, UK
- 94Biology Department and Center for Energy, Environment and Sustainability, Wake Forest University, 1834 Wake Forest Rd, Winston Salem, NC, 27106, USA
- 95Laboratoire Evolution et Diversité Biologique, CNRS and Université Paul Sabatier, UMR 5174 EDB, Toulouse, 31000, France
- 96Andes to Amazon Biodiversity Program, Madre de Dios, Madre de Dios, Peru
- 97Department of Anthropology, University of Texas at Austin, SAC 5.150, 2201 Speedway Stop C3200, Austin, TX, 78712, USA
- 98Fundación Puerto Rastrojo, Cra 10 No. 24-76 Oficina 1201, Bogotá, DC, Colombia
- 99Colegio de Ciencias Biológicas y Ambientales-COCIBA & Galapagos Institute for the Arts and Sciences-GAIAS, Universidad San Francisco de Quito-USFQ, Quito, Pichincha, Ecuador
- 100Department of Wildlife Ecology and Conservation, University of Florida, 110 Newins-Ziegler Hall, Gainesville, FL, 32611, USA
- 101Fundación Estación de Biología, Cra 10 No. 24-76 Oficina 1201, Bogotá, DC, Colombia
- 102ICNHS, Federal University of Mato Grosso, Av. Alexandre Ferronato 1200, Setor Industrial, Sinop, MT, 78.557-267, Brazil
- 103Direction régionale de la Guyane, ONF, Cayenne, F-97300, French Guiana
- 104PROTERRA, Instituto de Investigaciones de la Amazonía Peruana (IIAP), Av. A. Quiñones km 2,5, Iquitos, Loreto, 784, Peru
- 105ACEER Foundation, Jirón Cusco N° 370, Puerto Maldonado, Madre de Dios, Peru
- 106Amazon Conservation Team, Doekhieweg Oost #24, Paramaribo, Suriname
- 107Institut de Ciència i Tecnologia Ambientals, Universitat Autònoma de Barcelona, 08193 Bellaterra, Barcelona, Spain
- 108Environmental Change Institute, Oxford University Centre for the Environment, Dyson Perrins Building, South Parks Road, Oxford, England, OX1 3QY, UK
- 109Instituto de Ciencias Naturales, Universidad Nacional de Colombia, Apartado 7945, Bogotá, DC, Colombia
- 110Instituto de Ciência Agrárias, Universidade Federal Rural da Amazônia, Av. Presidente Tancredo Neves 2501, Belém, PA, 66.077-830, Brazil
- 111Escuela Profesional de Ingeniería Forestal, Universidad Nacional de San Antonio Abad del Cusco, Jirón San Martín 451, Puerto Maldonado, Madre de Dios, Peru
- 112Universidad Autónoma del Beni José Ballivián, Campus Universitario Final, Av. Ejercito, Riberalta, Beni, Bolivia
- 113Laboratory of Human Ecology, Instituto Venezolano de Investigaciones Científicas - IVIC, Ado 20632, Caracas, Caracas, 1020A, Venezuela
- 114Cambridge University Botanic Garden, 1 Brookside., Cambridge, CB2 1JE, UK
- 115School of Agriculture and Food Sciences - ARC Centre of Excellence for Environmental Decisions CEED, The University of Queensland, St. Lucia, QLD 4072, Australia
- 116University of Campinas, Plant Biology Department, Rua Monteiro Lobato, 255, Cidade Universitária Zeferino Vaz, Barão Geraldo, Campinas, São Paulo, CEP 13083-862, Brazil

- 117Resource Ecology Group, Wageningen University & Research, Droevendaalsesteeg 3a, Lumen, building number 100, Wageningen, Gelderland, 6708 PB, The Netherlands
- 118Laboratório de Ciências Ambientais, Universidade Estadual do Norte Fluminense, Av. Alberto Lamego 2000, Campos dos Goyatacazes, RJ, 28013-620, Brazil
- 119Instituto de Investigaciones para el Desarrollo Forestal (INDEFOR), Universidad de los Andes, Conjunto Forestal, 5101, Mérida, Mérida, Venezuela
- 120Departamento de Biología, Universidade Federal do Amazonas - UFAM – Instituto de Ciências Biológicas – ICB1, Av General Rodrigo Octavio 6200, Manaus, AM, 69080-900, Brazil
- 121GeoIS, El Día 369 y El Telégrafo, 3° Piso, Quito, Pichincha, Ecuador
- 122Department of Biology, University of Maryland, College Park, MD, 20742, USA
- 123University of Nottingham, University Park, Nottingham, NG7 2RD, UK
- 124School of Environmental and Forest Sciences, University of Washington, Seattle, WA, 98195-2100, USA
- 125Environmental Science and Policy, Northern Arizona University, Flagstaff, AZ, 86011, USA
- 126Geography and the Environment, University of Texas at Austin, 305 E. 23rd Street, CLA building, Austin, TX, 78712, USA
- 127Medio Ambiente, PLUSPRETOL, Iquitos, Loreto, Peru
- 128The Mauritius Herbarium, Agricultural Services, Ministry of Agro-Industry and Food Security, Reduit, 80835, Mauritius
- 129Department of Bioscience, Aarhus University, Building 1540 Ny Munkegade, Aarhus C, Aarhus, DK-8000, Denmark
- 130FOMABO, Manejo Forestal en las Tierras Tropicales de Bolivia, Sacta, Cochabamba, Bolivia
- 131Escuela de Ciencias Forestales (ESFOR), Universidad Mayor de San Simon (UMSS), Sacta, Cochabamba, Bolivia
- 132Tropenbos International, Lawickse Allee 11 PO Box 232, Wageningen, 6700 AE, The Netherlands
- 133School of Anthropology and Conservation, University of Kent, Marlowe Building, Canterbury, Kent, CT2 7NR, UK
- 134Herbario Nacional del Ecuador, Universidad Técnica del Norte, Quito, Pichincha, Ecuador
- 135Instituto de Biodiversidade e Floresta, Universidade Federal do Oeste do Pará, Rua Vera Paz, Campus Tapajós, Santarém, PA, 68015-110, Brazil
- 136Facultad de Biología, Universidad Nacional de la Amazonia Peruana, Pevas 5ta cdra, Iquitos, Loreto, Peru
- 137Department of Biology, University of Missouri, St. Louis, MO, 63121, USA
